# Supplementary material for: Selective oxidation of CH4 to valuable HCHO over a defective rTiO2/GO metal-free photocatalyst
Source: Royal Society of Chemistry journal article supplement (doi:10.1039/d2cy01055k), 2022-01-01
Supplement: d2cy01055k1.pdf [file d2cy01055k1.pdf]

1 **Supporting Information**

2

3 **Selective oxidation of CH<sub>4</sub> to HCHO over defective rTiO<sub>2</sub>/GO metal-free**  
4 **photocatalyst**

5 Yingdong Hao<sup>1,2,#</sup>, Fang Mao<sup>1,#</sup>, Yonghui Zhao<sup>1</sup>, Nannan Sun<sup>1,\*</sup>, Wei Wei<sup>1,3,\*</sup>

6 <sup>1</sup> CAS Key Lab of Low-Carbon Conversion Science and Engineering, Shanghai  
7 Advanced Research Institute, Chinese Academy of Sciences, Shanghai 201210, China

8 <sup>2</sup> University of Chinese Academy of Sciences, Beijing 100049, China

9 <sup>3</sup> School of Physical Science and Technology, ShanghaiTech University, Shanghai  
10 201210, China

11 # These authors contributed equally

12 \* Corresponding Author

13 E-mail address: sunnn@sari.ac.cn, weiwei@sari.ac.cn

14

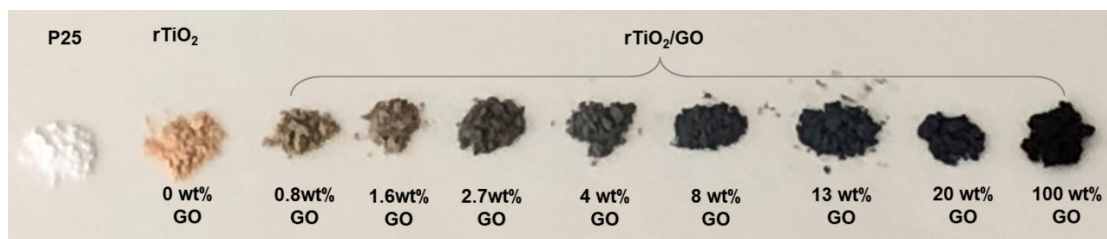

15  
16

**Fig. S1** Photographs of TiO<sub>2</sub> (P25) and the rTiO<sub>2</sub>/xGO photocatalysts.

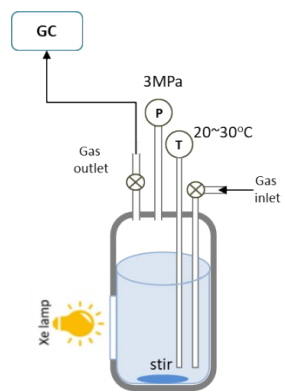

18  
19  
20

**Fig. S2** Schematic diagram of the photocatalytic reaction system.

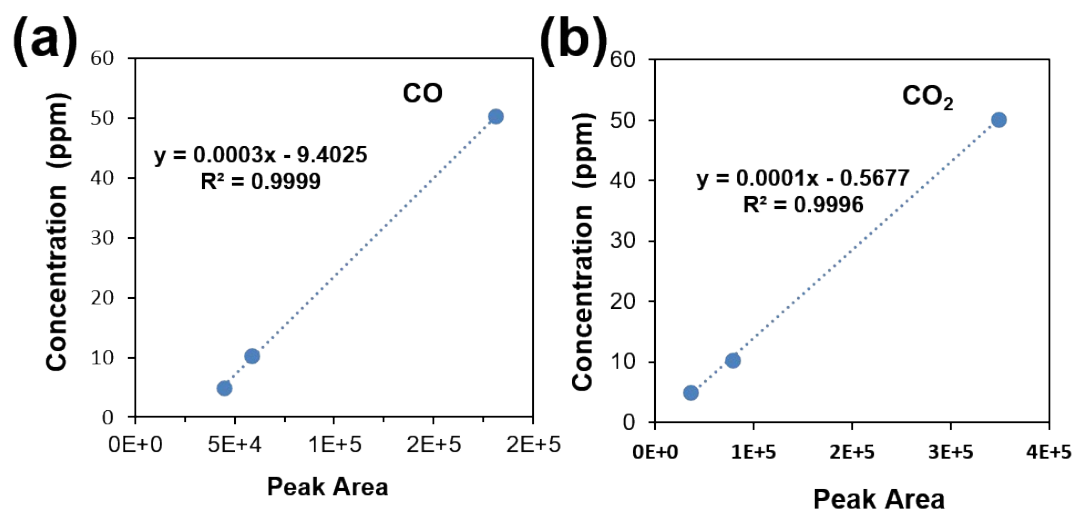

22

23

24

25

26

Fig. S3 Calibration curve for GC quantification of (a) CO and (b) CO<sub>2</sub>.

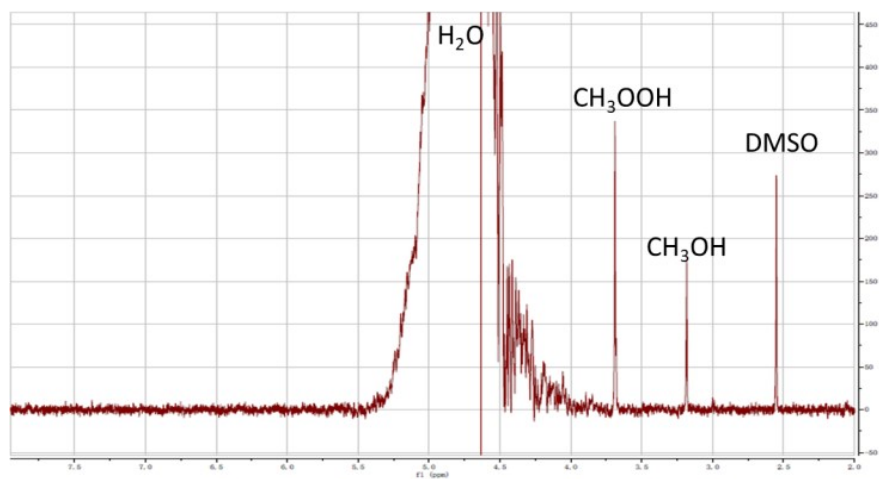

27  
28  
29  
30

**Fig. S4** Typical  $^1\text{H}$  NMR spectrum of the liquid products.

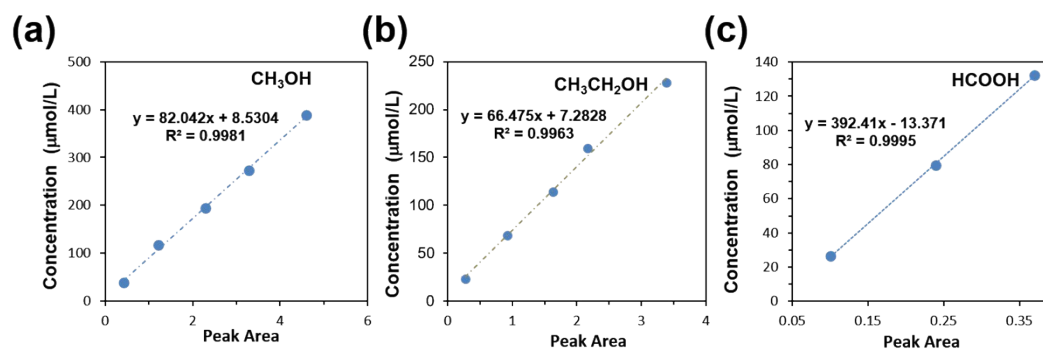

32

33 **Fig. S5** <sup>1</sup>H NMR calibration curves for (a) CH<sub>3</sub>OH, (b) CH<sub>3</sub>CH<sub>2</sub>OH, and (c) HCOOH. As the  
34 protons of methyl in CH<sub>3</sub>OH and CH<sub>3</sub>OOH molecules is same, quantification of CH<sub>3</sub>OOH is  
35 calibrated by the same curve as that of CH<sub>3</sub>OH.

36

37

38

39

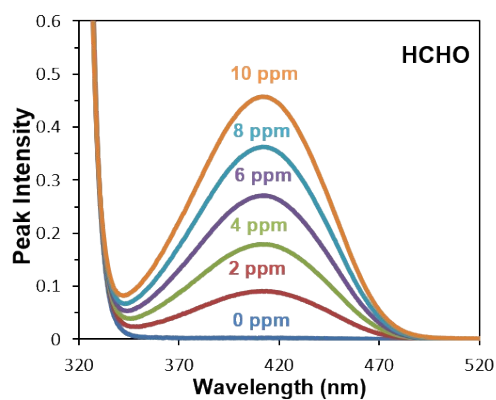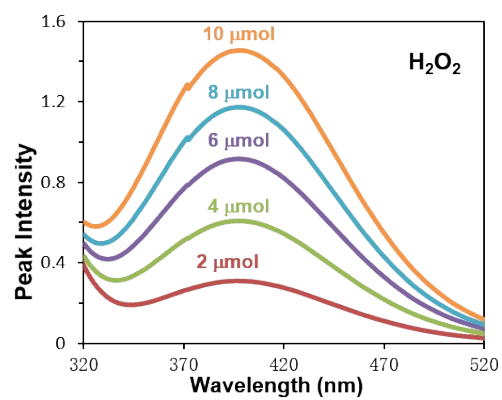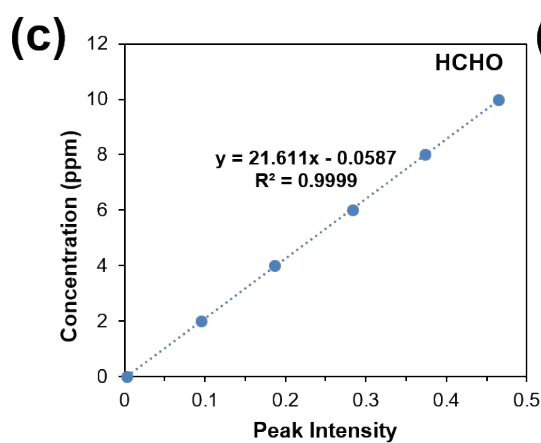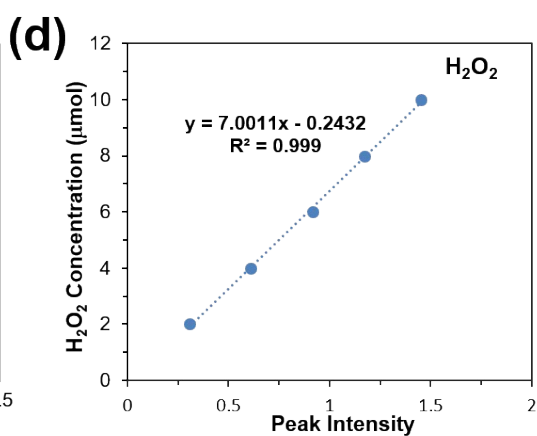

40

41 **Fig. S6** Analysis of HCHO and H<sub>2</sub>O<sub>2</sub> by UV-Vis spectra. UV-Vis absorption spectra (a) HCHO  
 42 and (b) H<sub>2</sub>O<sub>2</sub>. Calibration curves for (c) HCHO and (d) H<sub>2</sub>O<sub>2</sub>.

43

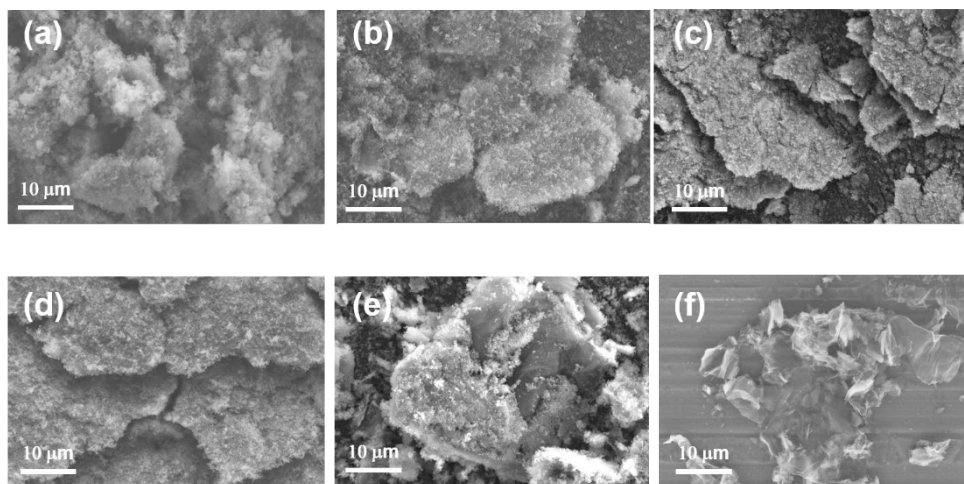

45

46

47

48

**Fig. S7** SEM images. (a) rTiO<sub>2</sub>, (b) rTiO<sub>2</sub>/0.8GO, (c) rTiO<sub>2</sub>/2.7GO, (d) rTiO<sub>2</sub>/4.0GO, (e) rTiO<sub>2</sub>/20.0GO, and (f) GO.



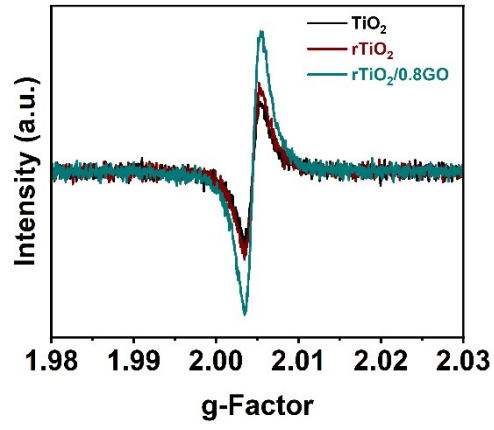

50

51

52

Fig. S8 EPR spectra.

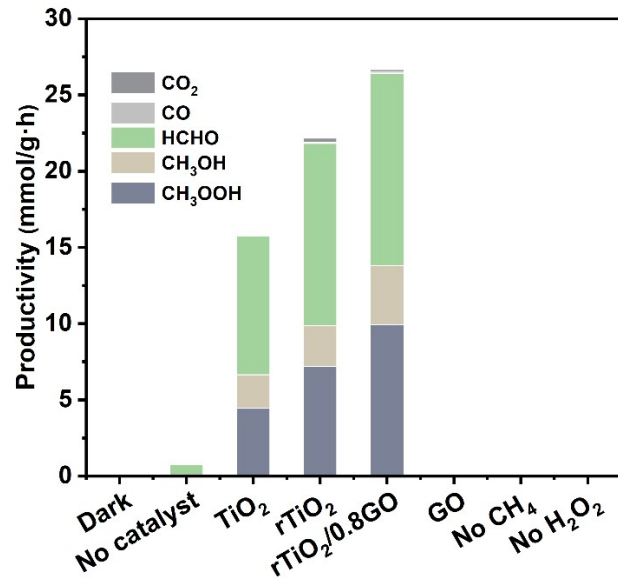

53  
54  
55  
56  
57

Fig. S9 Photocatalytic oxidation of CH<sub>4</sub> at different conditions.

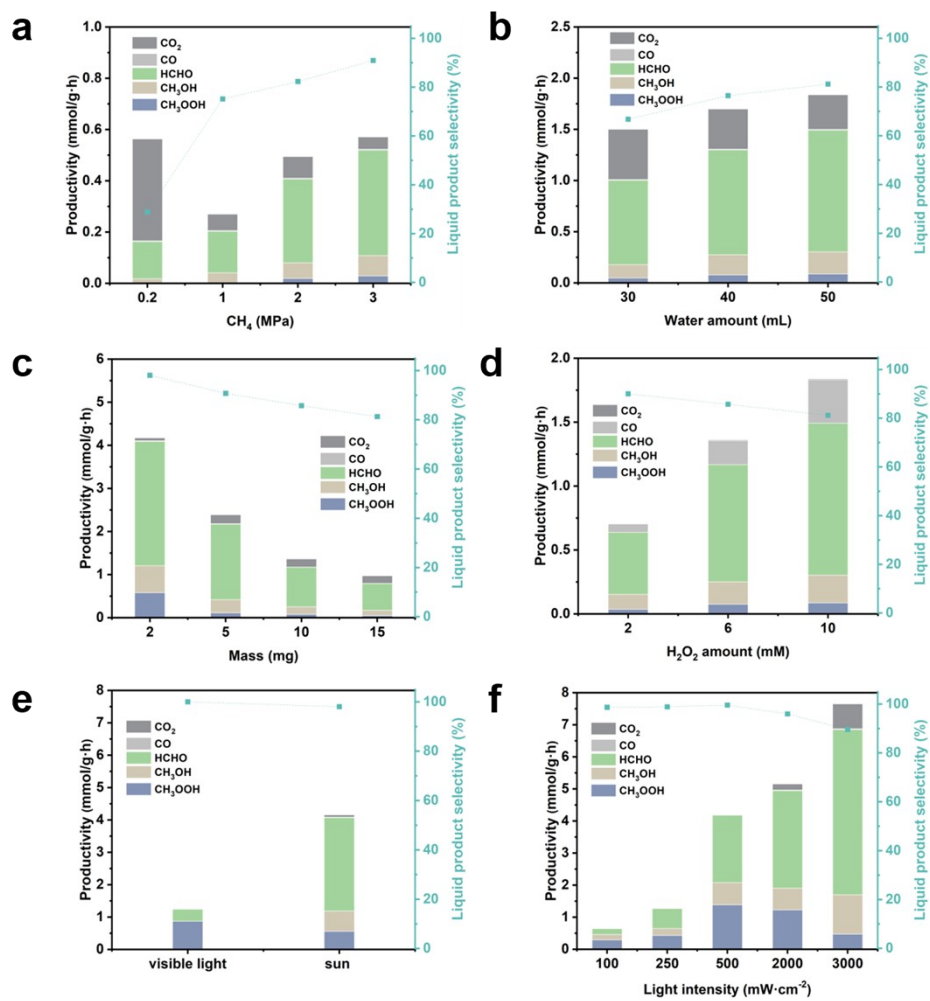

58

59

60

61

62

**Fig. S10** Effect of (a) CH<sub>4</sub> pressure, (b) H<sub>2</sub>O volume, (c) catalyst weight, (d) H<sub>2</sub>O<sub>2</sub> dosage, (e) light source (f) light intensity.

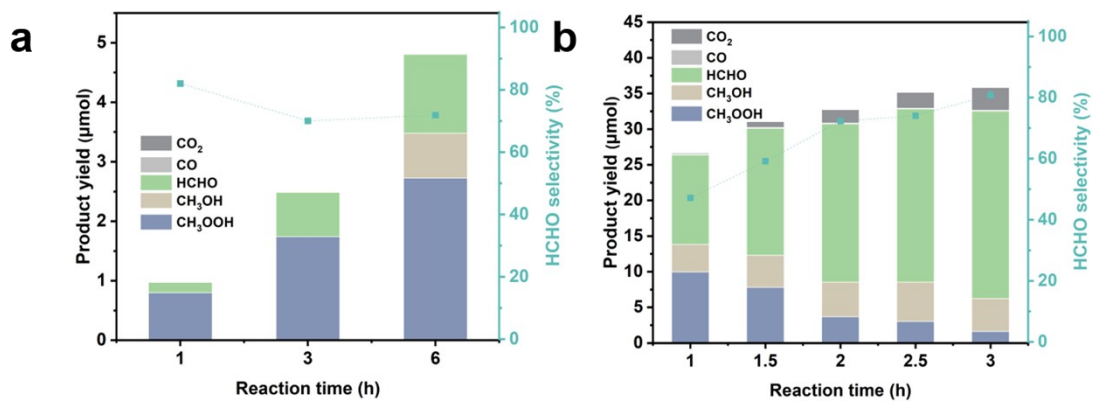

63

64

65

66

67

**Fig. S11** Photocatalytic oxidation of CH<sub>4</sub> under (a) visible light and (b) sun light.

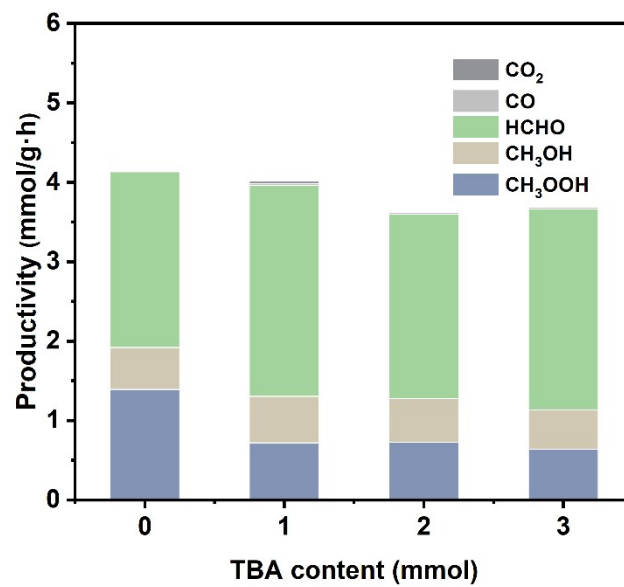

Fig. S12 •OH quenching with different TBA content.

68

69

70

71

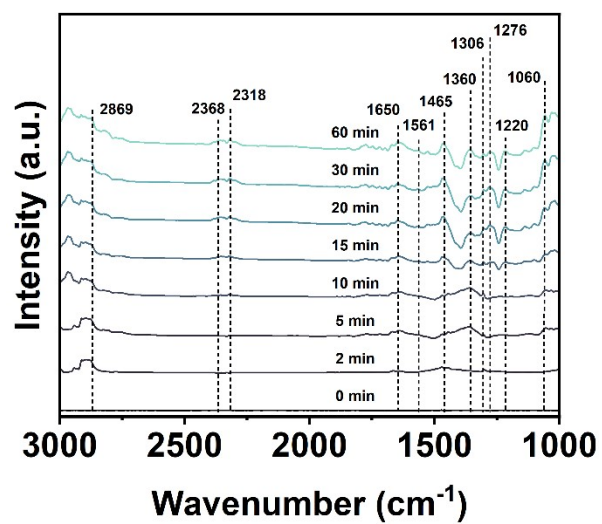

72

73

**Fig. S13** In situ FTIR spectra for CH<sub>4</sub> photooxidation over the rTiO<sub>2</sub>/0.8GO during light irradiation time from 0 to 60 min.

74

75

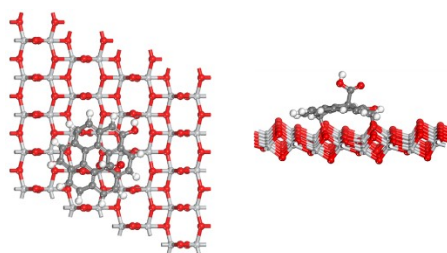

76

77

**Fig. S14** Top and side views of the  $\text{TiO}_2(101)/\text{GO}$  surface. (Dark gray: C; light gray: C; red: O; white: H).

78

79

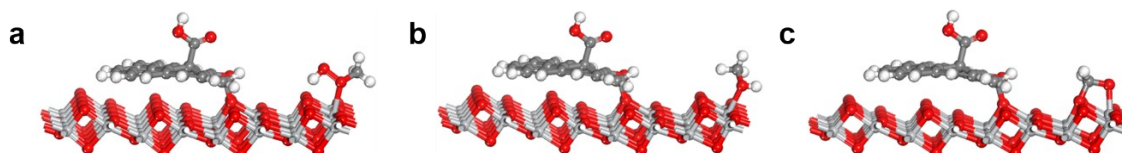

80

81

**Fig. S15** Side views of the optimized geometries of C1-oxygenates adsorption on the  $\text{TiO}_2/\text{GO}$  surfaces. (a)  $\text{CH}_3\text{OOH}$ , (b)  $\text{CH}_3\text{OH}$ , (c)  $\text{CH}_2\text{O}$ . (Dark gray: C; light gray: C; red: O; white: H).

82

83

84

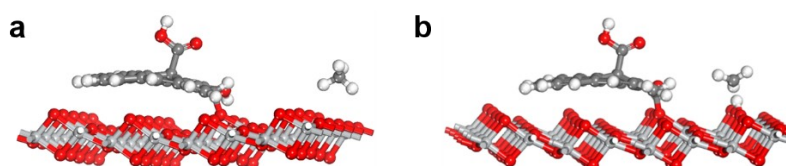

85

86

**Fig. S16** (a)  $\text{CH}_4$  adsorption structure and (b)  $\text{CH}_4$  dissociation transition states on the  $\text{TiO}_2(101)/\text{GO}$  surface. (Dark gray: C; light gray: C; red: O; white: H).

87

88

89 A large  $p(4\times 5)$  supercell of the  $\text{rTiO}_2(101)$  surface with the GO cluster was built to model the  
 90  $\text{rTiO}_2/\text{GO}$  system (Fig. S14)<sup>2</sup>. From van der Waals (vdW) corrected density functional theory (DFT)  
 91 calculation, it was found that the most stable adsorption sites of C1-oxygenates ( $\text{CH}_3\text{OOH}^*$ ,  
 92  $\text{CH}_3\text{OH}^*$  and  $\text{CH}_2\text{O}^*$ ) were the Ti atom sites (Fig. S15). Furthermore,  $\text{CH}_4$  dissociation preferably  
 93 happened on the lattice oxygen of  $\text{TiO}_2(101)$  surface, and the process is thermodynamically  
 94 prohibited on GO (Fig. S16a and b). Therefore, it was deduced that GO may have little in direct  
 95 activation of  $\text{CH}_4$ . In the revised manuscript, the above results and discussion are added.

96
